# Supplementary material
Source: Copernicus journal article supplement (doi:10.5194/amt-19-3491-2026)
Supplement: Supplementary file 1 [file amt-19-3491-2026-supplement.pdf]

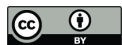

*Supplement of*

## **Near real-time & benchtop XRF intercomparison for PM elemental analysis on quartz and teflon filters: a case study across three European cities**

**Stefanos Papagiannis et al.**

*Correspondence to:* Stefanos Papagiannis (s.papagiannis@ipta.demokritos.gr) and Evangelia Diapouli (ldiapouli@ipta.demokritos.gr)

The copyright of individual parts of the supplement might differ from the article licence.

**Table S1: Limits of Detection in ng m<sup>-3</sup> for the benchtop ED-XRF spectrometer.**

|                | <b>ATH-DEM station</b>          | <b>DUB-P station</b>                    | <b>CAO-NIC station</b>                  |
|----------------|---------------------------------|-----------------------------------------|-----------------------------------------|
| <b>Element</b> | <b>PTFE (ng m<sup>-3</sup>)</b> | <b>Quartz fiber (ng m<sup>-3</sup>)</b> | <b>Quartz fiber (ng m<sup>-3</sup>)</b> |
| <b>Na</b>      | 11.7                            | 127.4                                   | 126.1                                   |
| <b>Mg</b>      | 6.0                             | 49.0                                    | 43.3                                    |
| <b>Al</b>      | 4.1                             | 56.7                                    | 50.9                                    |
| <b>Si</b>      | 2.4                             | -                                       | -                                       |
| <b>P</b>       | 0.7                             | 2.3                                     | 2.1                                     |
| <b>S</b>       | 0.5                             | 1.0                                     | 1.0                                     |
| <b>Cl</b>      | 0.3                             | 0.4                                     | 0.5                                     |
| <b>K</b>       | 0.4                             | 0.4                                     | 0.4                                     |
| <b>Ca</b>      | 2.5                             | 4.4                                     | 4.0                                     |
| <b>Ti</b>      | 1.5                             | 2.1                                     | 2.7                                     |
| <b>V</b>       | 1.0                             | 2.0                                     | 1.9                                     |
| <b>Cr</b>      | 0.8                             | 1.6                                     | 1.5                                     |
| <b>Mn</b>      | 0.6                             | 1.2                                     | 1.1                                     |
| <b>Fe</b>      | 0.9                             | 0.9                                     | 0.9                                     |
| <b>Co</b>      | 0.4                             | 0.9                                     | 0.6                                     |
| <b>Ni</b>      | 0.3                             | 0.7                                     | 0.6                                     |
| <b>Cu</b>      | 0.7                             | 0.8                                     | 0.7                                     |
| <b>Zn</b>      | 0.3                             | 0.8                                     | 0.7                                     |
| <b>Ga</b>      | 0.3                             | 0.7                                     | 0.6                                     |
| <b>Ge</b>      | 0.3                             | 0.6                                     | 0.6                                     |
| <b>As</b>      | 0.4                             | 1.1                                     | 1.0                                     |
| <b>Se</b>      | 0.9                             | 1.7                                     | 1.6                                     |
| <b>Br</b>      | 0.4                             | 1.1                                     | 0.8                                     |
| <b>Rb</b>      | 0.5                             | 0.8                                     | 0.8                                     |
| <b>Sr</b>      | 0.7                             | 1.3                                     | 1.1                                     |
| <b>Ag</b>      | 4.5                             | 6.8                                     | 6.2                                     |
| <b>Cd</b>      | 6.0                             | 5.9                                     | 7.3                                     |
| <b>Sn</b>      | 9.7                             | 11.8                                    | 10.8                                    |
| <b>Sb</b>      | 13.1                            | 15.2                                    | 14.0                                    |

|           |      |      |      |
|-----------|------|------|------|
| <b>Cs</b> | 40.7 | 51.2 | 47.0 |
| <b>Ba</b> | 44.5 | 55.8 | 51.4 |
| <b>Ce</b> | 54.8 | 69.4 | 64.4 |
| <b>Pt</b> | 1.6  | 3.4  | 3.1  |
| <b>Au</b> | 1.7  | 3.9  | 3.6  |
| <b>Hg</b> | 1.3  | 2.5  | 2.5  |
| <b>Pb</b> | 1.1  | 2.2  | 2.0  |

**Table S2: Limits of Detection in ng m<sup>-3</sup> for the Xact 625 and Xact 625i for 60-minute time resolution.**

| <b>Element</b> | <b>Xact 625 60 min (ng m<sup>-3</sup>)</b> | <b>Xact 6252i 60min (ng m<sup>-3</sup>)</b> |
|----------------|--------------------------------------------|---------------------------------------------|
| <b>Al</b>      | -                                          | 170                                         |
| <b>Si</b>      | 181                                        | 30.9                                        |
| <b>P</b>       | -                                          | 9                                           |
| <b>S</b>       | 12.14                                      | 5.5                                         |
| <b>Cl</b>      | 8.97                                       | 3                                           |
| <b>K</b>       | 2.37                                       | 2                                           |
| <b>Ca</b>      | 0.90                                       | 0.52                                        |
| <b>Ti</b>      | 0.38                                       | 0.28                                        |
| <b>V</b>       | 0.29                                       | 0.21                                        |
| <b>Cr</b>      | 0.29                                       | 0.2                                         |
| <b>Mn</b>      | 0.28                                       | 0.25                                        |
| <b>Fe</b>      | 0.76                                       | 0.3                                         |
| <b>Co</b>      | -                                          | 0.24                                        |
| <b>Ni</b>      | 0.23                                       | 0.17                                        |
| <b>Cu</b>      | 0.27                                       | 0.14                                        |
| <b>Zn</b>      | 0.23                                       | 0.12                                        |
| <b>Ga</b>      | -                                          | 0.1                                         |
| <b>Ge</b>      | -                                          | 0.1                                         |
| <b>As</b>      | 0.11                                       | 0.11                                        |
| <b>Se</b>      | 0.14                                       | 0.14                                        |
| <b>Br</b>      | -                                          | 0.18                                        |
| <b>Rb</b>      | -                                          | 0.33                                        |
| <b>Sr</b>      | 0.45                                       | 0.38                                        |
| <b>Y</b>       | -                                          | 0.48                                        |
| <b>Zr</b>      | -                                          | 0.57                                        |
| <b>Mo</b>      | 0.98                                       | -                                           |

|           |      |      |
|-----------|------|------|
| <b>Cd</b> | 5.75 | 4.4  |
| <b>In</b> | -    | 5.4  |
| <b>Sn</b> | -    | 7.1  |
| <b>Sb</b> | 0.66 | 9    |
| <b>Ba</b> | 0.95 | 0.67 |
| <b>Ce</b> | 0.78 | -    |
| <b>Pt</b> | 0.23 | -    |
| <b>Hg</b> | -    | 0.21 |
| <b>Tl</b> | -    | 0.2  |
| <b>Pb</b> | 0.22 | 0.22 |
| <b>Bi</b> | -    | 0.23 |

5

**Table S3: Summary of the number of samples with measured elemental concentrations above the limit of quantification (>LOQ) relative to the total number of paired samples collected at the ATH-DEM, CAO-NIC, and DUB-P monitoring sites.**

| <b>Element</b> | <b>Ath-DEM (21 pairs total)</b> |           | <b>CAO NIC (256 pairs total)</b> |           | <b>DUB P (50 pairs total)</b> |          |
|----------------|---------------------------------|-----------|----------------------------------|-----------|-------------------------------|----------|
|                | Benchtop<br>ED-XRF              | Xact 625i | Benchtop<br>ED-XRF               | Xact 625i | Benchtop<br>ED-XRF            | Xact 625 |
| <b>Si</b>      | 21                              | 4         | -                                | -         | -                             | -        |
| <b>S</b>       | 21                              | 21        | 256                              | 256       | 50                            | 50       |
| <b>Cl</b>      | 10                              | 18        | 177                              | 210       | 49                            | 50       |
| <b>K</b>       | 21                              | 21        | 256                              | 256       | 50                            | 50       |
| <b>Ca</b>      | 21                              | 21        | 256                              | 256       | 37                            | 50       |
| <b>Ti</b>      | 6                               | 21        | 128                              | 255       | -                             | -        |
| <b>V</b>       | -                               | -         | -                                | -         | 23                            | 46       |
| <b>Mn</b>      | -                               | -         | 66                               | 154       | -                             | -        |
| <b>Fe</b>      | 21                              | 21        | 255                              | 255       | 46                            | 50       |
| <b>Ni</b>      | -                               | -         | -                                | -         | 30                            | 49       |
| <b>Cu</b>      | -                               | -         | 75                               | 146       | -                             | -        |
| <b>Zn</b>      | 21                              | 21        | 243                              | 256       | 27                            | 50       |
| <b>Sr</b>      | -                               | -         | 21                               | 38        | -                             | -        |
| <b>Pb</b>      | -                               | -         | 76                               | 126       | -                             | -        |

10

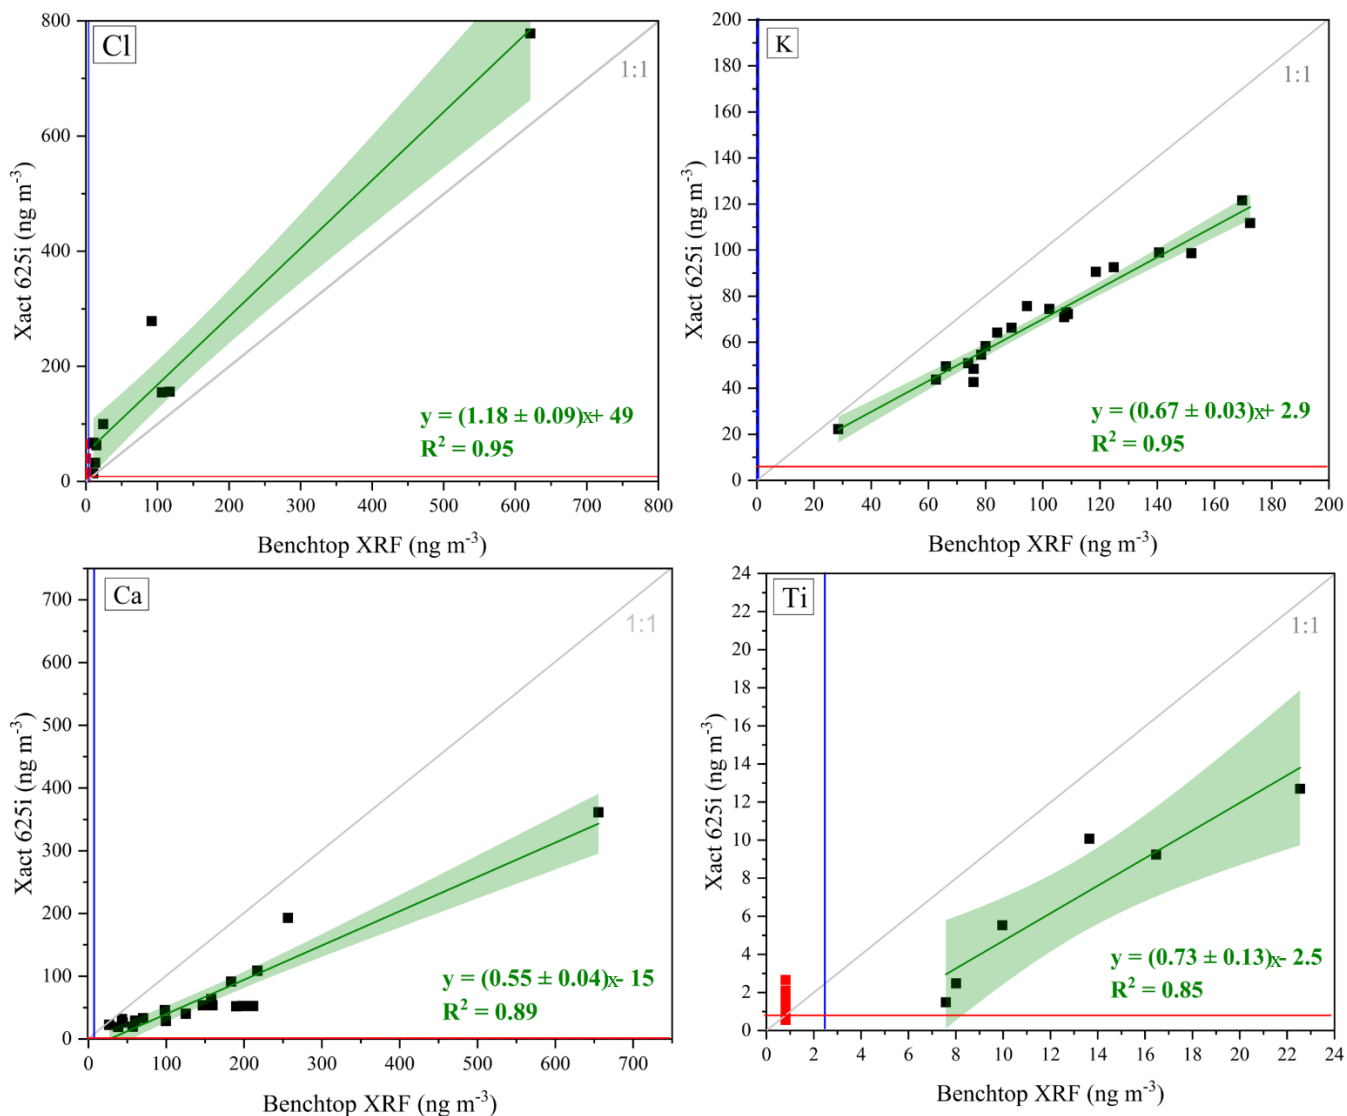

Figure S1: Comparison of elemental concentrations in ng m<sup>-3</sup> for Si, K, Cl, Ti, Fe and Zn for the ATH-DEM station. The grey line represents the 1:1 reference line, while the green line represents the linear regression fit. The blue lines indicate the LOQ threshold for the benchtop XRF spectrometer, while the red lines represent the corresponding threshold for the Xact 625i continuous elemental monitor.

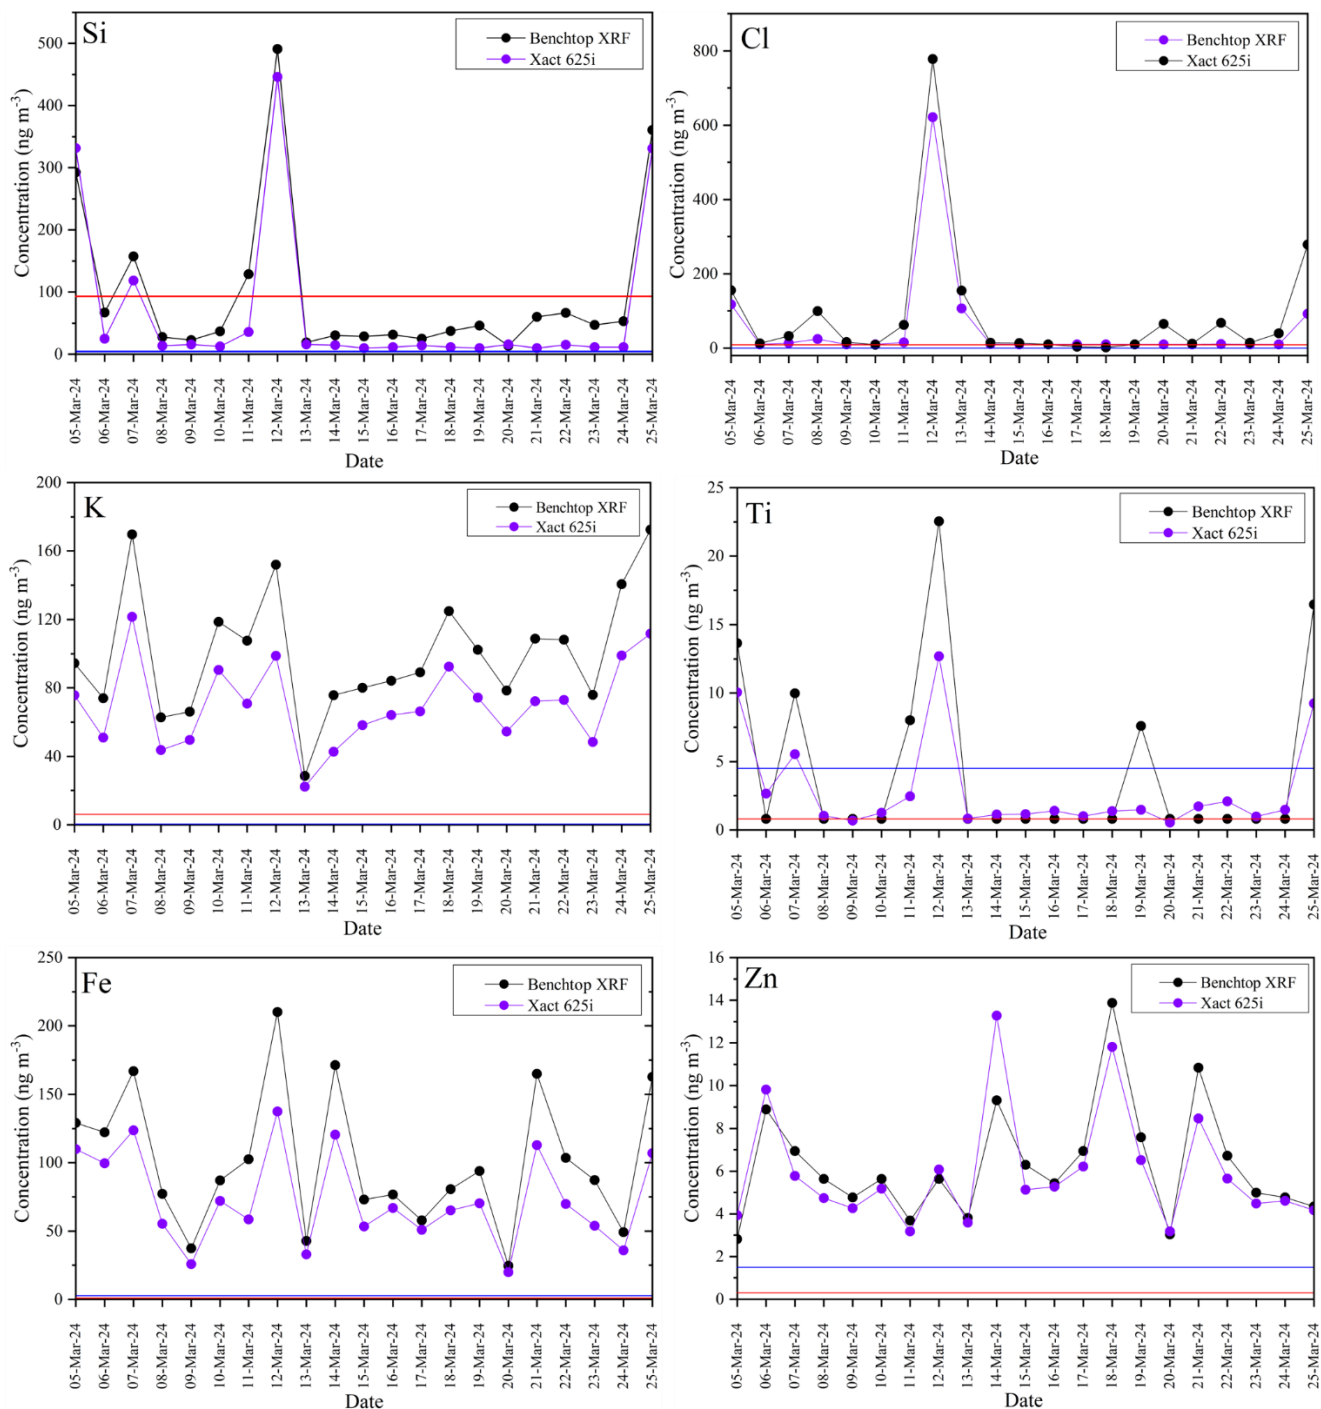

Figure S2: Time series graphs comparing Si, K, Cl, Ti Fe and Zn concentrations (ng m<sup>-3</sup>) from March 5 to 25, 2024 for the ATH-DEM station. The blue lines indicate the LOQ threshold for the benchtop XRF spectrometer, while the red lines represent the corresponding threshold for the Xact 625i continuous elemental monitor.

20

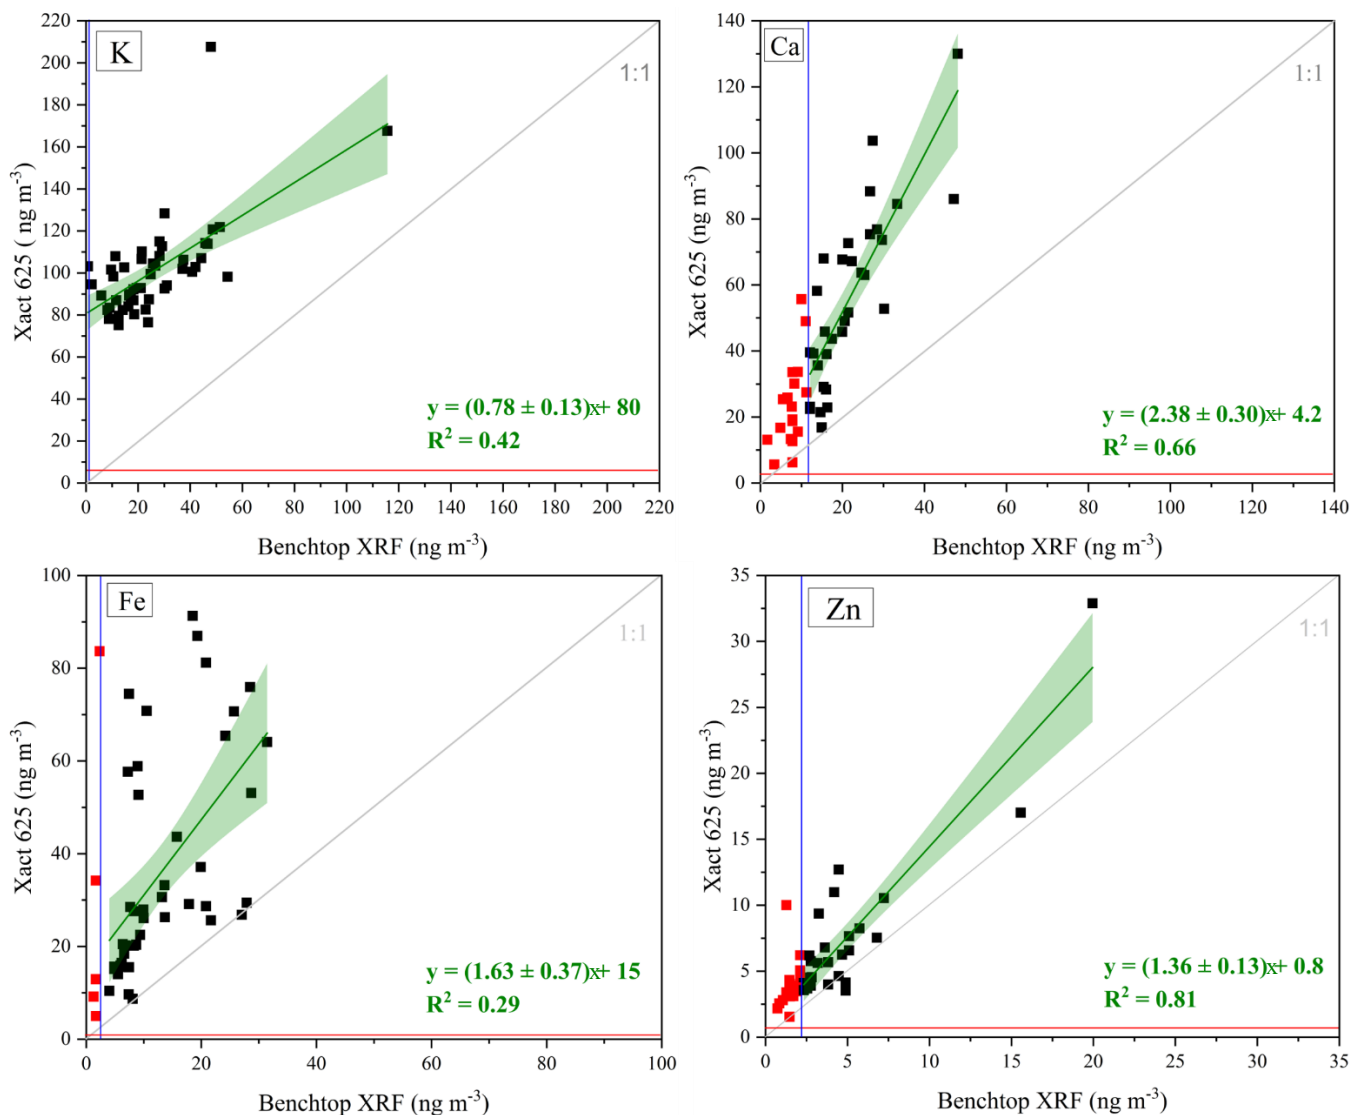

25 **Figure S3: Comparison of elemental concentrations in  $\text{ng m}^{-3}$  for K, Ca, Fe and Zn for the DUB-P station. The grey line represents the 1:1 reference line, while the green line represents the linear regression fit. The blue lines indicate the LOQ thresholds for the benchtop XRF spectrometer, while the red lines represent the corresponding thresholds for the Xact 625 continuous elemental monitor.**

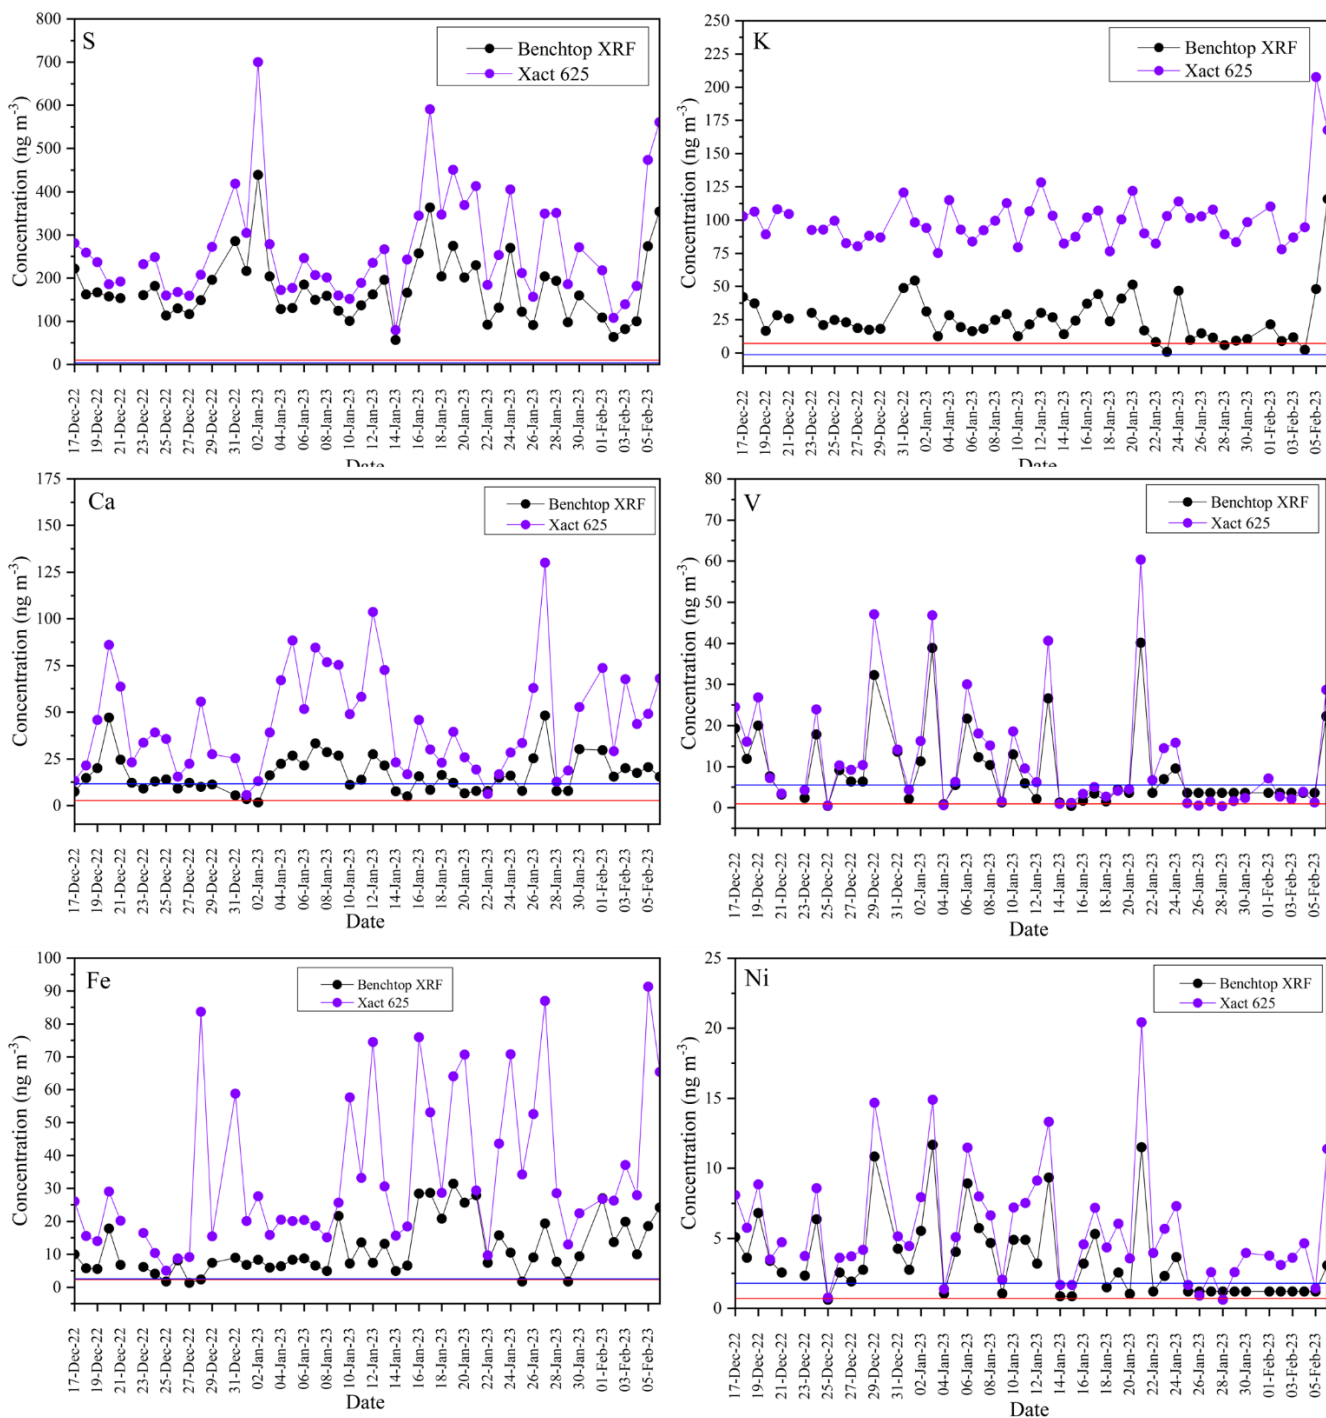

35 **Figure S4:** Time series graphs comparing S, K, Ca, V, Fe and Ni concentrations (ng m<sup>-3</sup>) from December 17, 2022 to February 06, 2023 for the for the DUB-P station. The blue lines indicate the LOQ threshold for the benchtop XRF spectrometer, while the red lines represent the corresponding threshold for the Xact 625i continuous elemental monitor. S and K concentrations are shown after quartz-filter correction.

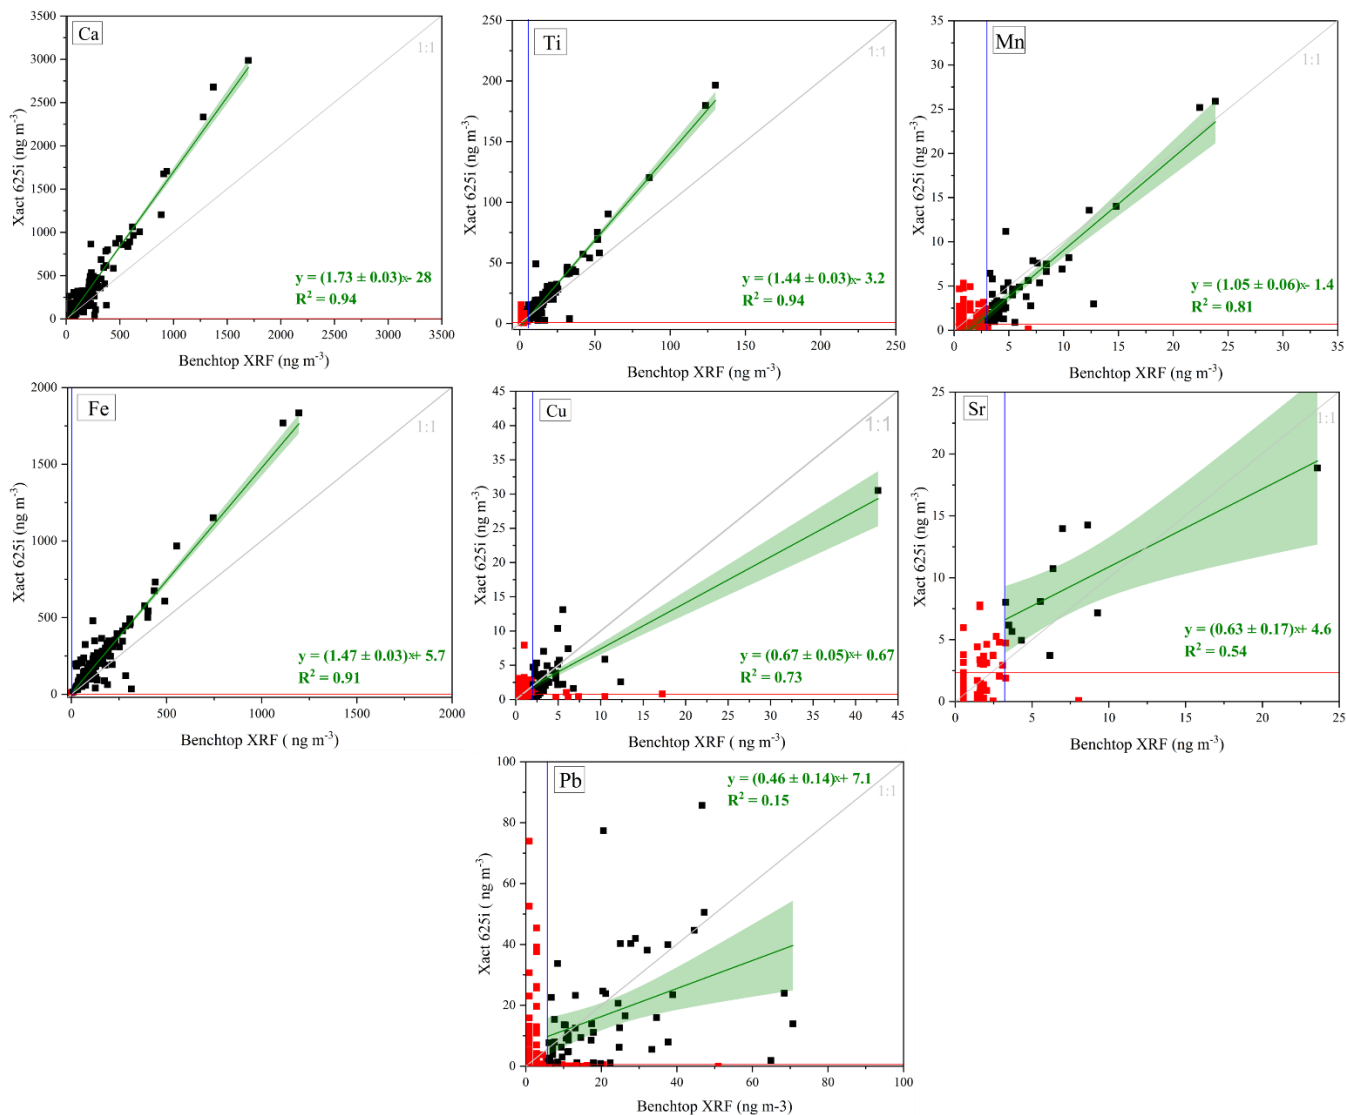

40 **Figure S5: Comparison of elemental concentrations in ng m<sup>-3</sup> for Ca, Ti, Mn, Cu, Sr and Pb for the CAO-NIC station. The grey line represents the 1:1 reference line, while the green line represents the linear regression fit. The blue lines indicate the LOQ thresholds for the benchtop XRF spectrometer, while the red lines represent the corresponding thresholds for the Xact 625i continuous elemental monitor.**

45

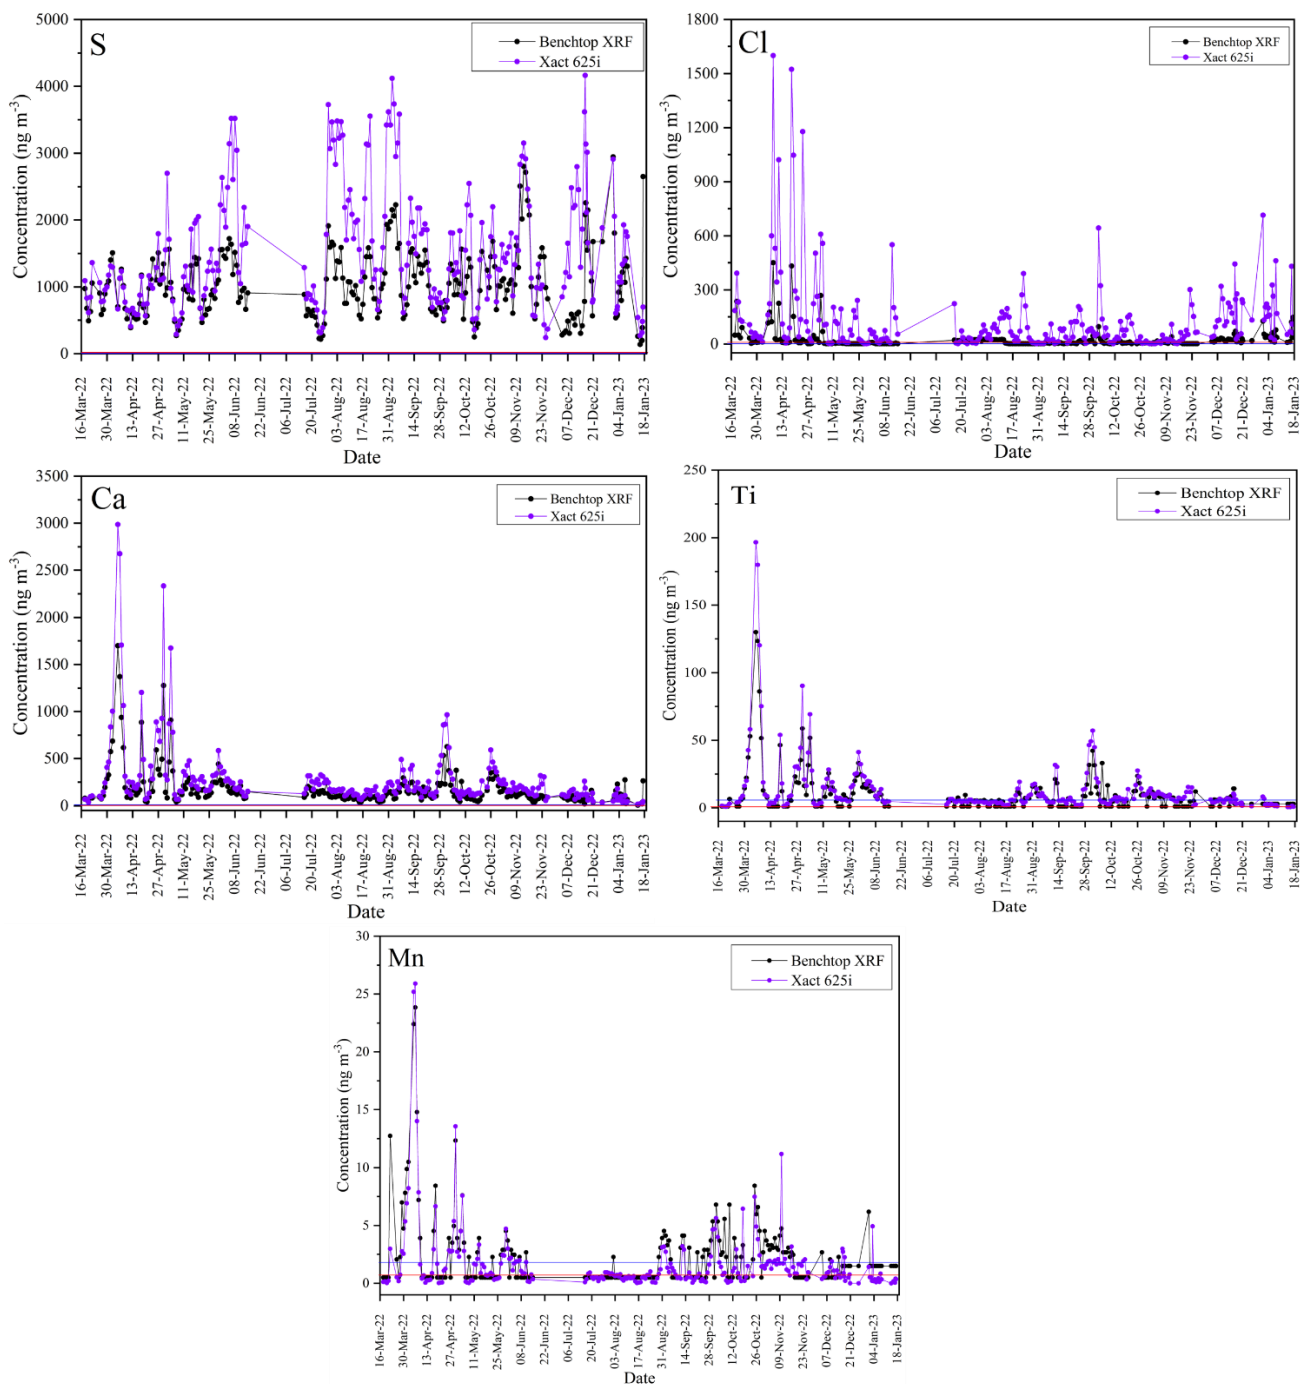

**Figure S6:** Time series graphs comparing S, Cl, Ca, Ti and Mn concentrations in  $\text{ng m}^{-3}$  from 18 March 2022 to 17 January 2023 for the CAO-NIC station. Concentrations for S and Cl are shown after applying the quartz-filter correction. The blue lines indicate the LOQ thresholds for the benchtop XRF spectrometer, while the red lines represent the corresponding thresholds for the Xact 625i continuous elemental monitor.

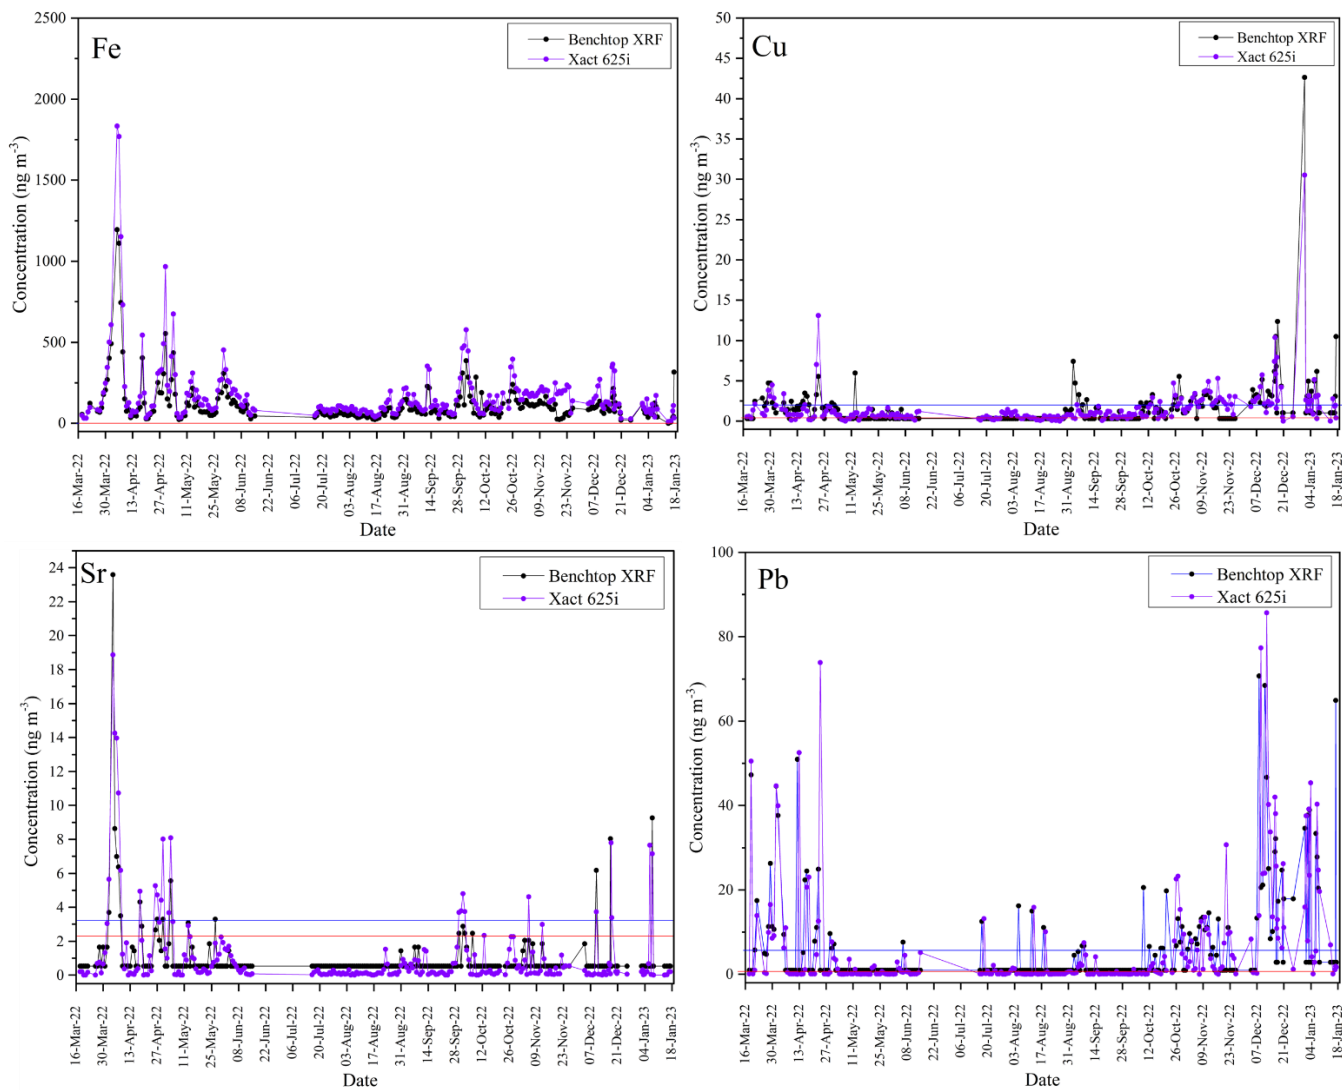

55

**Figure S7: Time series graphs comparing Fe, Cu, Sr and Pb concentrations in ng m<sup>-3</sup> from 18 March 2022 to 17 January 2023 for the CAO-NIC station. Concentrations for S and Cl are shown after applying the quartz-filter correction. The blue lines indicate the LOQ thresholds for the benchtop XRF spectrometer, while the red lines represent the corresponding thresholds for the Xact 625i continuous elemental monitor.**

60
